# Supplementary material for: A rhodamine-based chemosensor with diphenylselenium for highly selective fluorescence turn-on detection of Hg2+in vitro and in vivo
Source: Royal Society of Chemistry journal article supplement (doi:10.1039/c7ra02459b), 2017-01-01
Supplement: c7ra02459b1.pdf [file c7ra02459b1.pdf]

Supporting information for

**A rhodamine-based chemosensor with diphenylselenium for highly selective fluorescent turn-on detection of Hg<sup>2+</sup> *in vitro* and *in vivo***

Parthiban Venkatesan, Natesan Thirumalivasan and Shu-Pao Wu\*

Department of Applied Chemistry, National Chiao Tung University, Hsinchu 300, Taiwan

\*Corresponding author.

Tel.: +886-3-5712121-ext56506; Fax: +886-3-5723764

E-mail: [spwu@mail.nctu.edu.tw](mailto:spwu@mail.nctu.edu.tw)

**Contents**

1. **Figure S1.** <sup>1</sup>H NMR (300 MHz, DMSO) spectrum of **RhoSe**
2. **Figure S2.** <sup>13</sup>C NMR (300 MHz, DMSO) spectrum of **RhoSe**
3. **Figure S3.** LR ESI<sup>+</sup> Mass spectrum of **RhoSe**
4. **Figure S4.** HR ESI<sup>+</sup> Mass spectrum of **RhoSe**
5. **Figure S5.** Detection limit for titration of Hg<sup>2+</sup> (0~3 equiv. respectively) against ratio of fluorescence response for **RhoSe** (10 μM) in CH<sub>3</sub>OH/H<sub>2</sub>O (v/v = 9:1) solution. The excitation wavelength was 510 nm.
6. **Figure S6.** Binding constant for titration of Hg<sup>2+</sup> (0 to 3.0 eq) against ratio of fluorescence response for (a) **RhoSe** (10 μM) in CH<sub>3</sub>OH/H<sub>2</sub>O (v/v = 9:1) solution. The excitation wavelength was 510 nm.
7. **Figure S7.** Mass Spectrum of **RhoSe-Hg<sup>2+</sup>** Complex
8. **Figure S8.** Job plot of the **RhoSe-Hg<sup>2+</sup>** complex in CH<sub>3</sub>OH/H<sub>2</sub>O (v/v = 9:1) solution. The total concentration of **RhoSe** and Hg<sup>2+</sup> was 50 μM. The excitation wavelength was 510 nm.
9. **Figure S9.** HOMO and LUMO levels of **RhoSe** and **RhoSe-Hg<sup>2+</sup>**.
10. **Figure S10.** Strip methods of (a) Color change and (b) fluorescence changes of **RhoSe** (1mM) after addition of various metal ions.
11. **Figure S11.** Cell viability values (%) estimated by an MTT assay versus incubation concentrations of **RhoSe**. HeLa cells were cultured in the presence of **RhoSe** (0–25 μM) at 37 °C for 24 h.

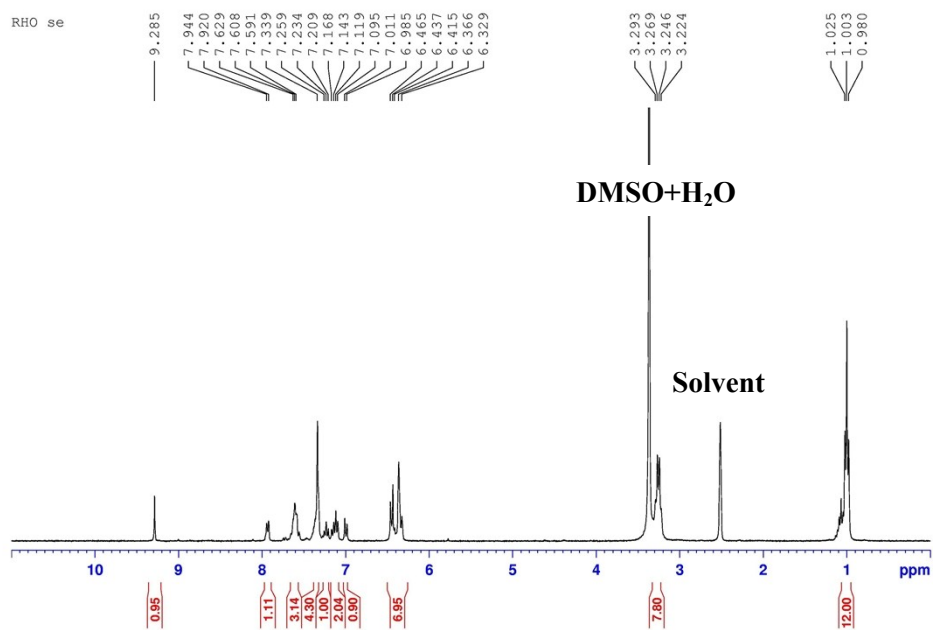

Figure S1. <sup>1</sup>H NMR (300 MHz, DMSO) spectrum of **RhoSe**

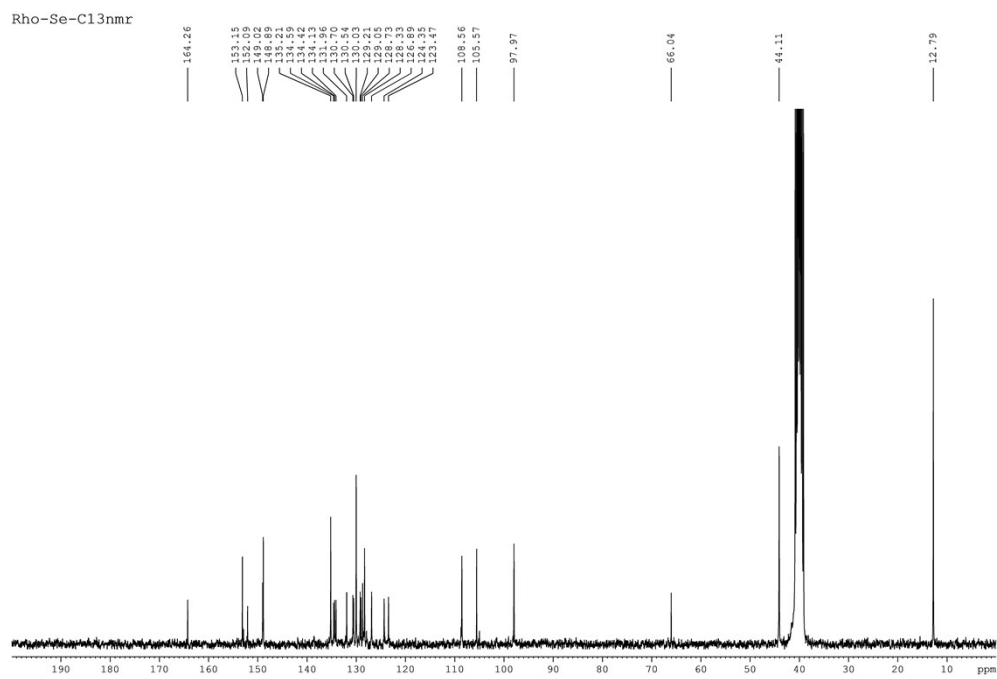

Figure S2. <sup>13</sup>C NMR (300 MHz, DMSO) spectrum of **RhoSe**

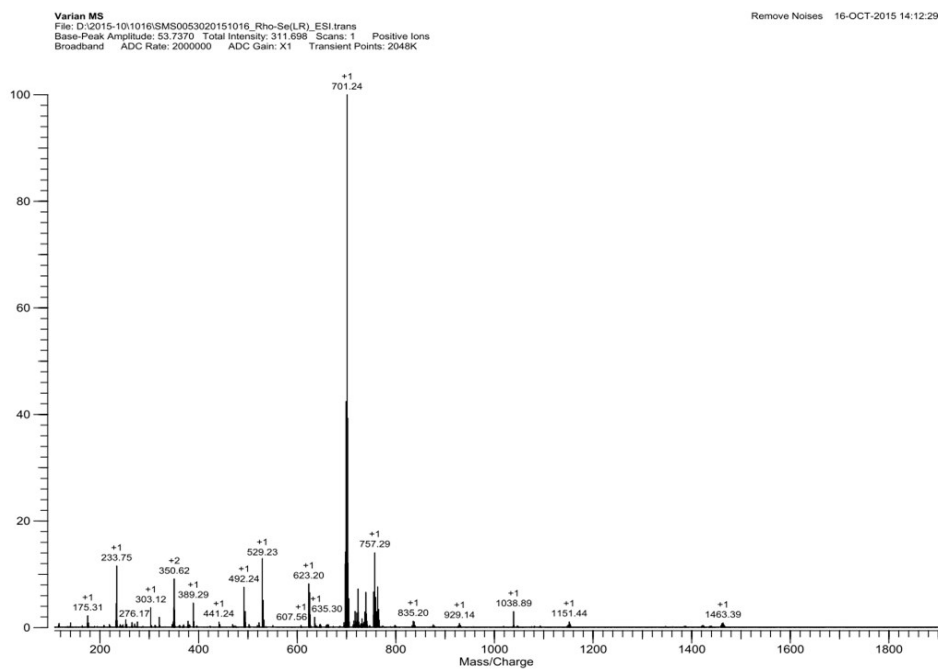

**Figure S3.** LR ESI<sup>+</sup> Mass spectrum of RhoSe

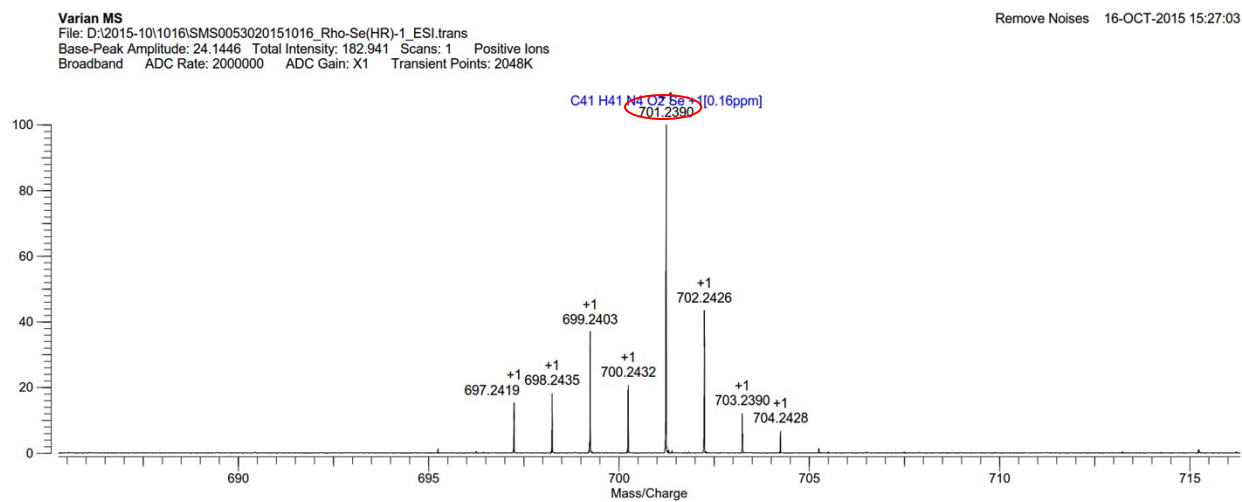

**Figure S4.** HR ESI<sup>+</sup> Mass spectrum of RhoSe

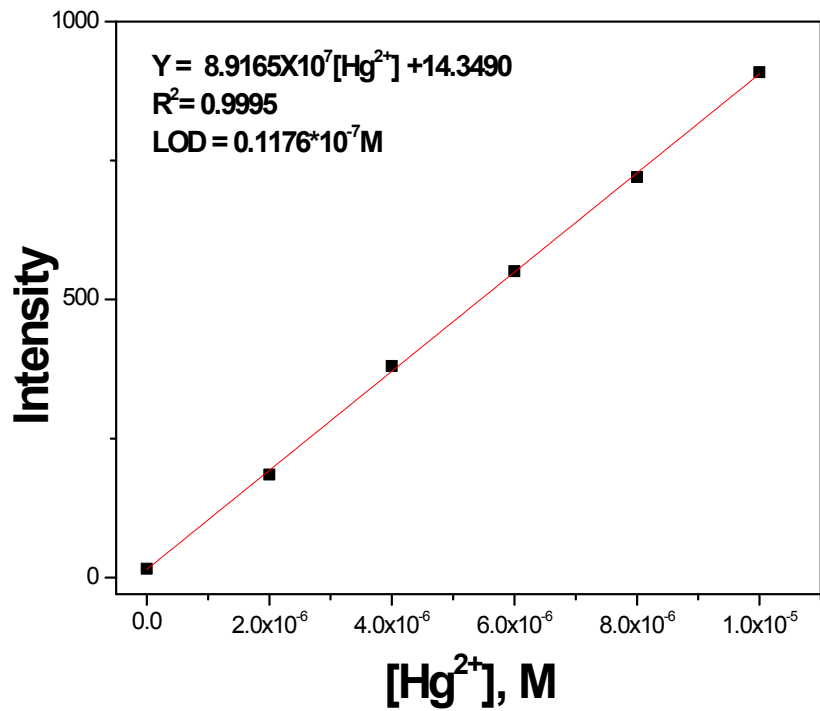

**Figure S5.** Detection limit for titration of Hg<sup>2+</sup> (0~1 equiv. respectively) against ratio of fluorescence response for **RhoSe** (10 $\mu$ M) in CH<sub>3</sub>OH/H<sub>2</sub>O (v/v = 9:1) solution. The excitation wavelength was 510 nm.

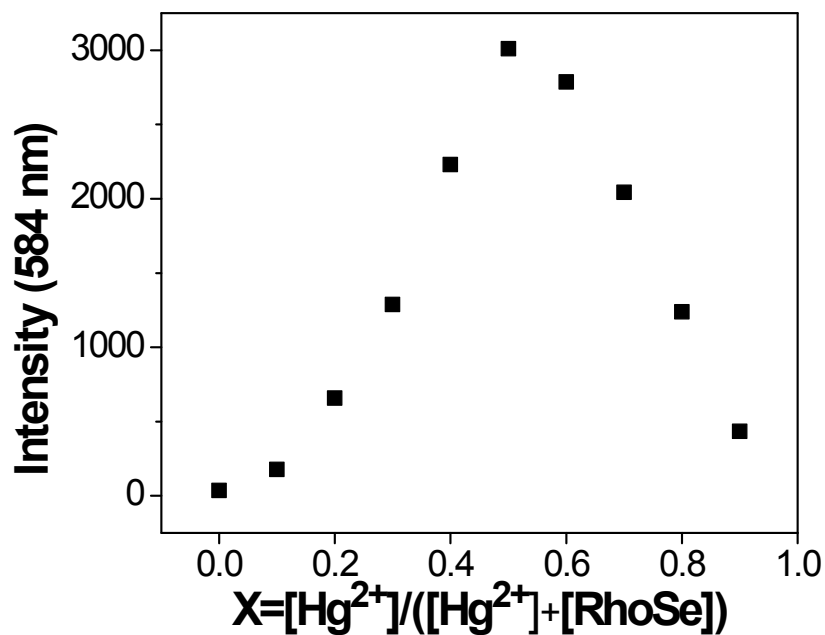

**Figure S6.** Job plot of the **RhoSe-Hg<sup>2+</sup>** complex in CH<sub>3</sub>OH/H<sub>2</sub>O (v/v = 9:1) solution. The total concentration of **RhoSe** and Hg<sup>2+</sup> was 50 μM. The excitation wavelength was 510 nm.

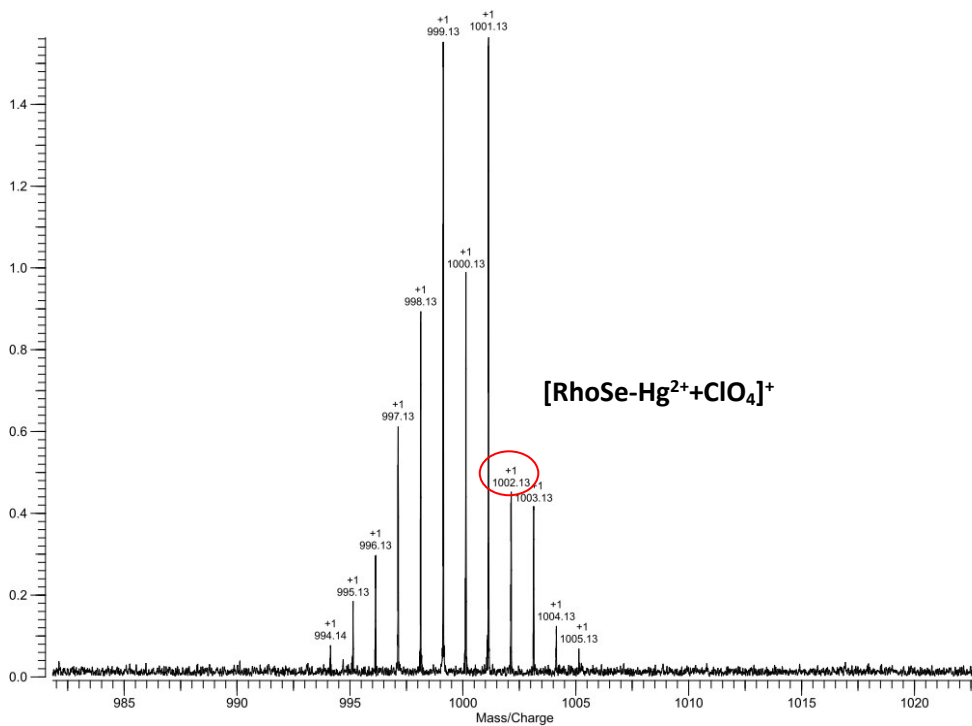

**Figure S7.** Mass spectrum of **RhoSe-Hg<sup>2+</sup>** complex

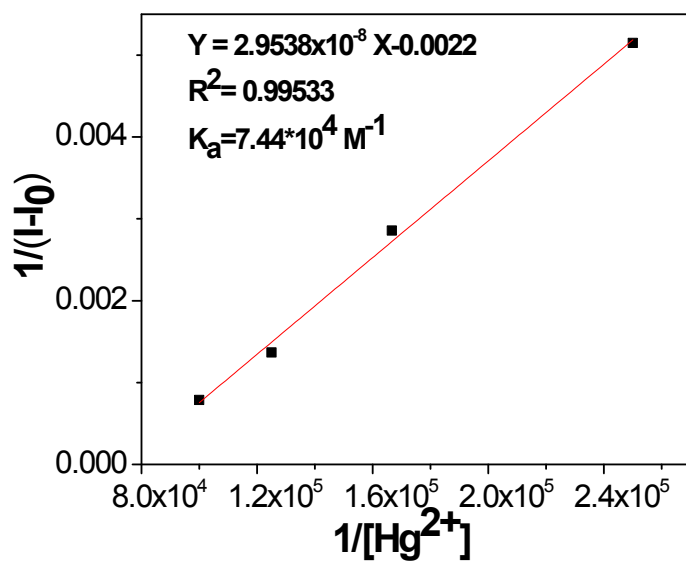

**Figure S8.** Binding constant for titration of  $\text{Hg}^{2+}$  (0 to 3.0 eq) against ratio of fluorescence response for **RhoSe** (10  $\mu\text{M}$ ) in  $\text{CH}_3\text{OH}/\text{H}_2\text{O}$  (v/v = 9:1) solution. The excitation wavelength was 510 nm.

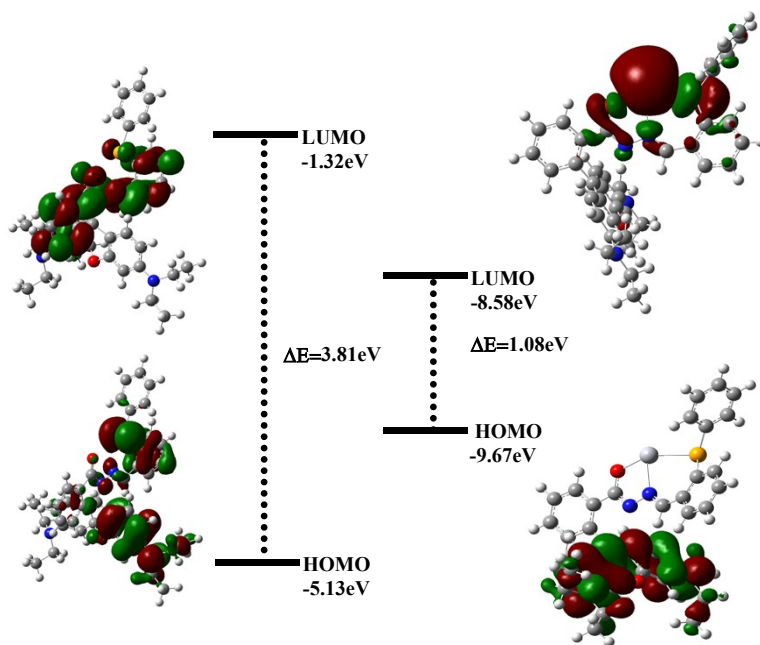

**Figure S9.** HOMO and LUMO levels of **RhoSe** and **RhoSe- $\text{Hg}^{2+}$** .

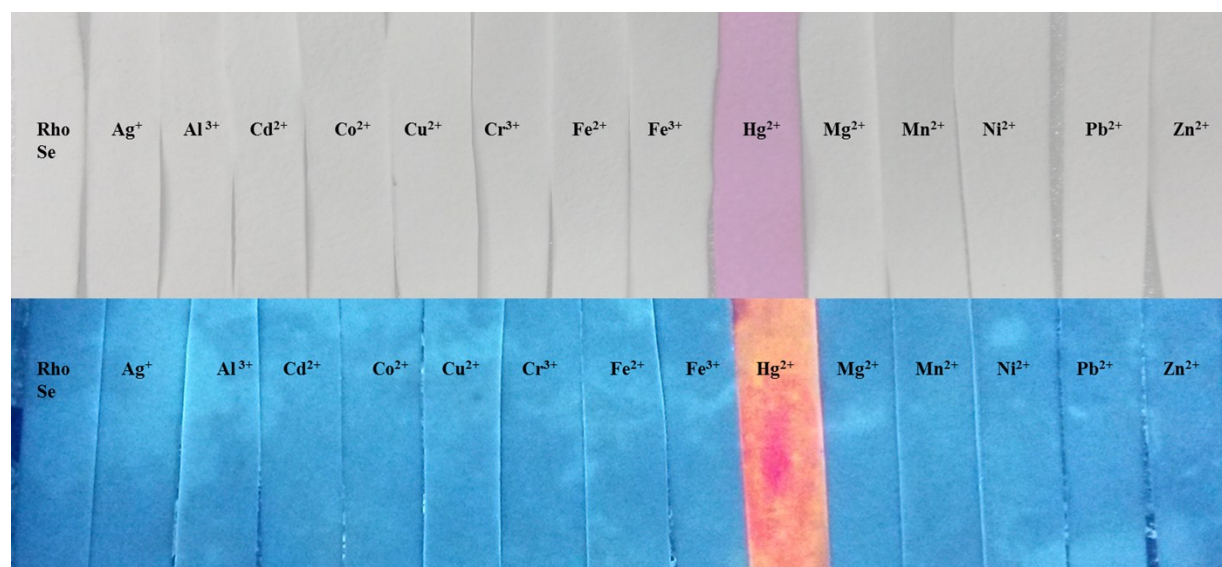

**Figure S10.** Strip methods of (a) color change and (b) fluorescence changes of **RhoSe** (1mM) after addition of various metal ions

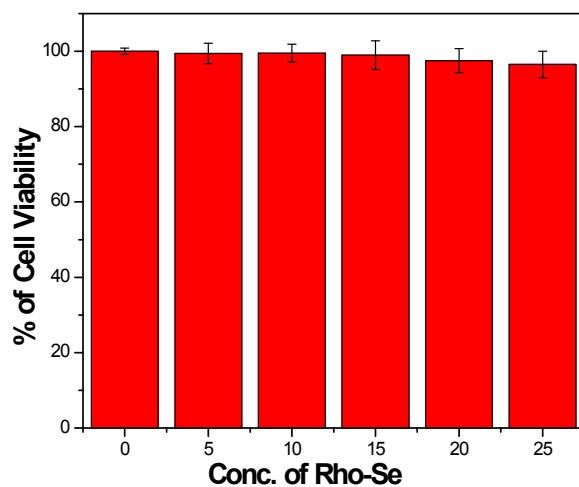

**Figure S11.** Cell viability values (%) estimated by an MTT assay versus incubation concentrations of **RhoSe**. HeLa cells were cultured in the presence of **RhoSe** (0–25  $\mu$ M) at 37  $^{\circ}$ C for 24 h.
